# Supplementary material
Source: publisher figshare collection journal article supplement (https://gsajournals.figshare.com/articles/dataset/_/6564572)
Supplement: Supplementary file 5 [file 2]

table S1

| Gene                   | Forward                  | Reverse                  |
|------------------------|--------------------------|--------------------------|
| <i>Z. nevadensis</i>   |                          |                          |
| <i>ZnMet</i> (dsRNA)   | T7+GAGGATGATCAGGGTGGAGA  | T7+TCGAAGCTGTTTCATCTGGTG |
| <i>ZnSRC</i> (dsRNA)   | T7+TGGTCAGTCCAGTGGTGGTA  | T7+TACGCAGACGCGTGTAGAC   |
| <i>ZnKr-h1</i> (dsRNA) | T7+CCGTTTTGTCTAGCTGTAGCC | T7+GCATAGTGGATGACCGACCT  |
| <i>ZnShr</i> (dsPCR)   | T7+ACTGCACGTACTGCAACTCG  | T7+GATGCTGGTGTGCTGAAAA   |
| <i>ZnSpo</i> (dsRNA)   | T7+GCACCTCCAAGAAGATCCAA  | T7+TGAAGTACTCGGGCTTGCTT  |
| <i>ZnEcR</i> (dsRNA)   | T7+ACAGAGCGTCTGGCTACCAT  | T7+TCAGCTGGACTGTGAGGATG  |
| <i>ZnE74</i> (dsRNA)   | T7+GCCAAGAGGAAGAGTCGTGA  | T7+TCACGCTCCTGTGCAGTCTA  |
| <i>ZnE75</i> (dsRNA)   | T7+GCCAACTCTGGCTCAACTTC  | T7+TGGAGTTGTGGTGAGGAGTG  |
| <i>ZnHR3</i> (dsRNA)   | T7+CAACTGCAGCCCAACTACAA  | T7+GCACACAATTCTGGCTGAGA  |
| <i>ZnHR39</i> (dsRNA)  | T7+GGCTCCACCTGGAAGTGATA  | T7+GAAAAGCAGGAGCTCACACC  |
| <i>ZnMet</i> (qPCR)    | ATCACGATGTGCTGGACAAG     | GTGATGATGAAGTGGAGGTGTC   |
| <i>ZnSRC</i> (qPCR)    | ATCGGCGATAATGAGATTGC     | AACTCTGGCCCAATGACAAC     |
| <i>ZnKr-h1</i> (qPCR)  | CCGCTGCTGTCTAGTAATC      | ATGAACACTCGTATGCCTTGTC   |
| <i>ZnNev</i> (qPCR)    | CGTCGTTCTACCGATGGATT     | CACTTTCTCTGCCTTTTCG      |
| <i>ZnShr</i> (qPCR)    | CTGGGAAGGAAGGAGGATTC     | CAGTTTATACGCGTGCAAGG     |
| <i>ZnSpo</i> (qPCR)    | ACTTCTTGGGAGGCCACTCT     | GCGTCCACTTCTTCTGAAC      |
| <i>ZnPhm</i> (qPCR)    | ACTTATCGGCATTGCTGGAC     | TCCCTCCAAGCAAATAATGC     |
| <i>ZnDib</i> (qPCR)    | CAAAAGGGATCACGGTCTTC     | AATCTTGTCTCCACCCATCG     |
| <i>ZnSad</i> (qPCR)    | CCATCACTGTCACGAGTCCA     | CAGGGGACCTCATCTTGTTC     |
| <i>ZnShd</i> (qPCR)    | ACAGAACCACAGTCCCTGCT     | GATGGAAGCGTTCAGAGTCC     |
| <i>ZnEcR</i> (qPCR)    | CCACAGAGCAGTCTGAATGG     | GAGACACAACCTCCTCTGCTG    |
| <i>ZnUSP</i> (qPCR)    | CACCGTAACCTCAGCACATCAG   | CGCATCTTAGCAACAAGTTCTG   |
| <i>ZnBr-C</i> (qPCR)   | TCTGCTGTCTCCACACATCAG    | TGTAGCTTCAGGTGATGGCG     |
| <i>ZnE63</i> (qPCR)    | AAAATTGGCAGTTGGTTTGC     | TTTCGTGCACCACACCTAAA     |
| <i>ZnE74</i> (qPCR)    | CCACGCACCAAGAAGAAGAT     | CAGCAAGAACTCCACAGGT      |
| <i>ZnE75</i> (qPCR)    | CCGCAGAACTTGAAGATGAG     | AGCATGGGTTCCACTTTGTC     |
| <i>ZnHR3</i> (qPCR)    | GCAACAAGAACTGCGTCGTA     | ACTTCACCGCATCTCTGGAC     |
| <i>ZnHR4</i> (qPCR)    | ACTTCCACGTCCTGTTGGTC     | TGCCATAACCTCTCCATGT      |
| <i>ZnHR38</i> (qPCR)   | AGCAGAGTCTGGTTTCGAG      | CGGGCTCAGGGTTGTAGTTA     |
| <i>ZnHR39</i> (qPCR)   | GAGGAGGATGACGTCTCAGG     | TCCAACCTACGCGCTTTTCT     |
| <i>ZnHR78</i> (qPCR)   | TCGGCATTTATGGTGCAATTA    | TTGTTCCACGACACTGGTA      |
| <i>ZnHR96</i> (qPCR)   | GCCAGATATTCTGGGTTGA      | ACAAGATTGCGACGTGACTG     |
| <i>ZnFTZ-F1</i> (qPCR) | TTCTCGCCGATTTTAGGAGA     | TCCACCTCGCACTGATTGTA     |
| <i>Znb-actin</i>       | AGCGGGAATCGTCCGTGAC      | CAATGGTGATGACCTGCCCAT    |
| <i>ZnEF1-alpha</i>     | GCATGCACTGTTGGCTTTTA     | TTCTCTCAAATCGGGTTTCAG    |
| <i>ZnNADH-dh</i>       | CGGCAAGGAAGCAAATAAAG     | TTGGGTTGGGGGTATCAGC      |
| <i>C. punctulatus</i>  |                          |                          |
| <i>CpMet</i> (dsRNA)   | T7+TCATGATGCTTCTGGTCAGC  | T7+AGCGGACATCATCCTTATGC  |
| <i>CpKr-h1</i> (dsRNA) | T7+GCGAATCATCTTGTGCTTCA  | T7+CTCTATCTCCGGCTCGTCTG  |
| <i>CpMet</i> (qPCR)    | GAGGTGATGGACGGTTTCAT     | TGTGGATGTCCAAGCAATGT     |
| <i>CpKr-h1</i> (qPCR)  | CGGACAACCTCGTAATCCACA    | GGACCTTCAGCTGTTTGGAG     |
| <i>CpNev</i> (qPCR)    | GTCTGTCTATGGTGAACGTG     | CCTGCGAATGGATTGATCTT     |
| <i>CpShr</i> (qPCR)    | CACCAGCCATTGTGCATTAG     | CAACACGAAGACCGTCACAC     |
| <i>CpSpo</i> (qPCR)    | AAAATCGTGGCCAATAATCG     | CACGACGTCACCATAACGAC     |
| <i>CpDib</i> (qPCR)    | GGTTTAGAAGAGGGGCCCTTG    | GGTGTCGCTTTCTCTTGCTC     |
| <i>CpEcR</i> (qPCR)    | AACAAACGGGTCACTGAAG      | GGCTTCACCCCAATTACTGA     |
| <i>CpE63</i> (qPCR)    | AGATGGTGTGGTGCATGAAA     | CGGAGTTTGACAGGTGAGGT     |
| <i>CpE74</i> (qPCR)    | GTTCTTGGCCCCATACTACC     | GGTAGTGCTGTTGTGGCTGA     |
| <i>CpE75</i> (qPCR)    | CTTCTCGAAGCGGTTCTCAC     | AGCCTTGAGCAGTGTGACCT     |
| <i>CpHR3</i> (qPCR)    | AGACAGAACTGCGCCTGAT      | TACGTGTAGCCGCAATTGTA     |
| <i>CpHR39</i> (qPCR)   | TTCATCTCGATGATGGCAAA     | TTCCAGTAGATCGCACCACA     |
| <i>CpHR96</i> (qPCR)   | CCGGGATTATCCATGTCATC     | GTGTGGTTGTGGGACATCTG     |
| <i>Cpb-actin</i>       | TTCTTGGGTATGGAATCCTG     | GTGTTGGCGTACAGGTCCTT     |
| <i>CpEF1-alpha</i>     | CCTGGGCACAGAGATTTTCAT    | GAACCTCTCCCGTACCAGCAG    |
| <i>CpNADH-dh</i>       | CGGTTTGAAATTGTTTTATGGA   | AAATTAGCACCCAACCCTGA     |
| T7 promoter            | TAATACGACTCACTATAGGG     |                          |
