# Supplementary material
Source: publisher figshare collection journal article supplement (https://gsajournals.figshare.com/articles/dataset/_/6564572)
Supplement: Supplementary file 6 [file 2]

table S2

|         | GeNorm (stability value)  | NormFinder (stability value) |
|---------|---------------------------|------------------------------|
| Fig. 3  |                           |                              |
|         | <i>EF1-alpha</i> (0.394)  | <i>EF1-alpha</i> (0.078)     |
|         | <i>NADH-dh</i> (0.469)    | <i>NADH-dh</i> (0.241)       |
|         | <i>beta-actin</i> (0.639) | <i>beta-actin</i> (0.432)    |
| Fig. 4  |                           |                              |
|         | <i>EF1-alpha</i> (1.575)  | <i>EF1-alpha</i> (0.103)     |
|         | <i>beta-actin</i> (1.617) | <i>beta-actin</i> (0.369)    |
|         | <i>NADH-dh</i> (2.894)    | <i>NADH-dh</i> (2.001)       |
| Fig. S4 |                           |                              |
|         | <i>EF1-alpha</i> (0.352)  | <i>EF1-alpha</i> (0.081)     |
|         | <i>NADH-dh</i> (0.387)    | <i>NADH-dh</i> (0.173)       |
|         | <i>beta-actin</i> (0.505) | <i>beta-actin</i> (0.331)    |
