# Supplementary material
Source: publisher figshare collection journal article supplement (https://gsajournals.figshare.com/articles/dataset/_/6564572)

## 20E synthesis genes

— GFP  
— *ZnSRC<sup>RNAi</sup>*  
— *ZnKr-h1<sup>RNAi</sup>*

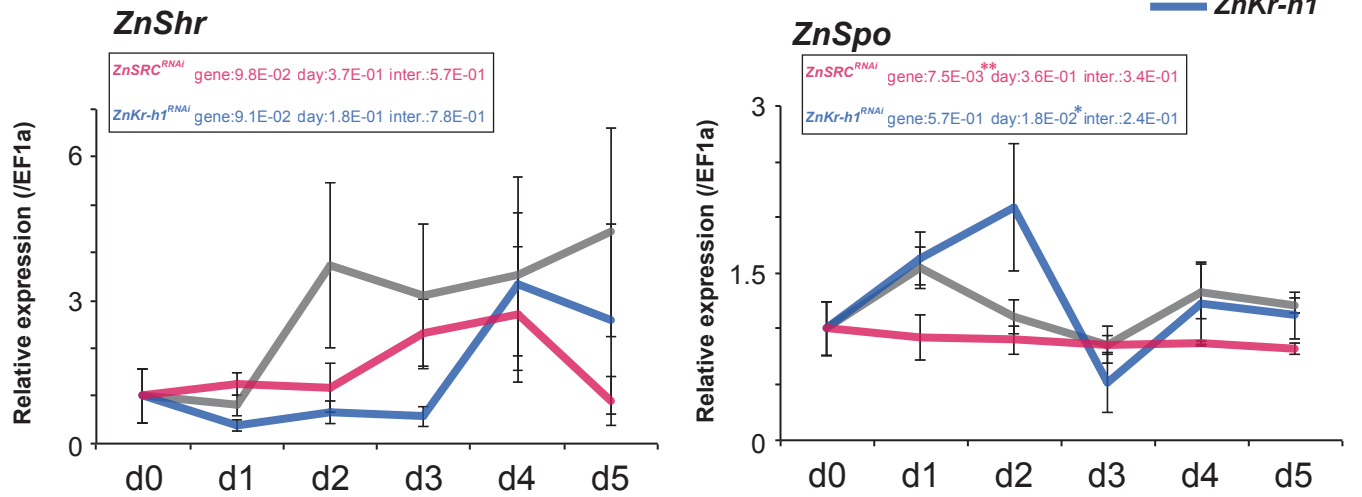

## 20E signaling genes

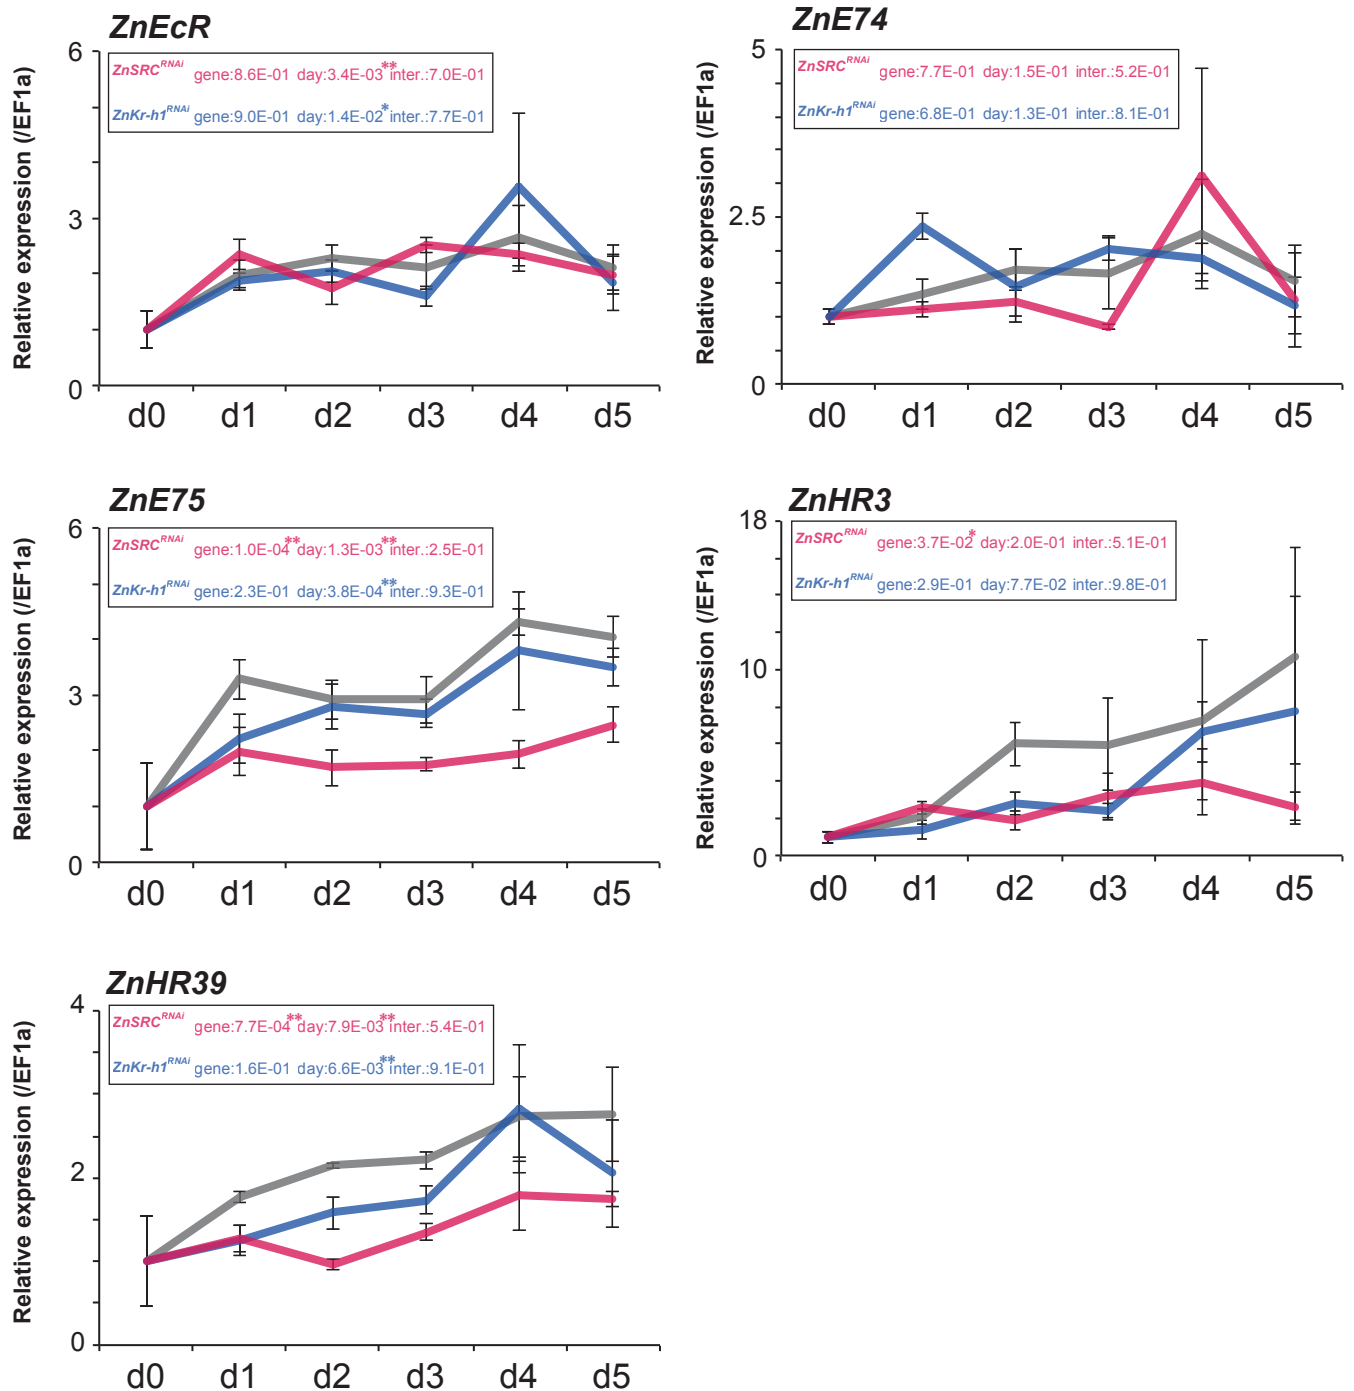

Fig.S4

Supplement: Supplementary file 1 [file 2]

A

*Z. nevadensis*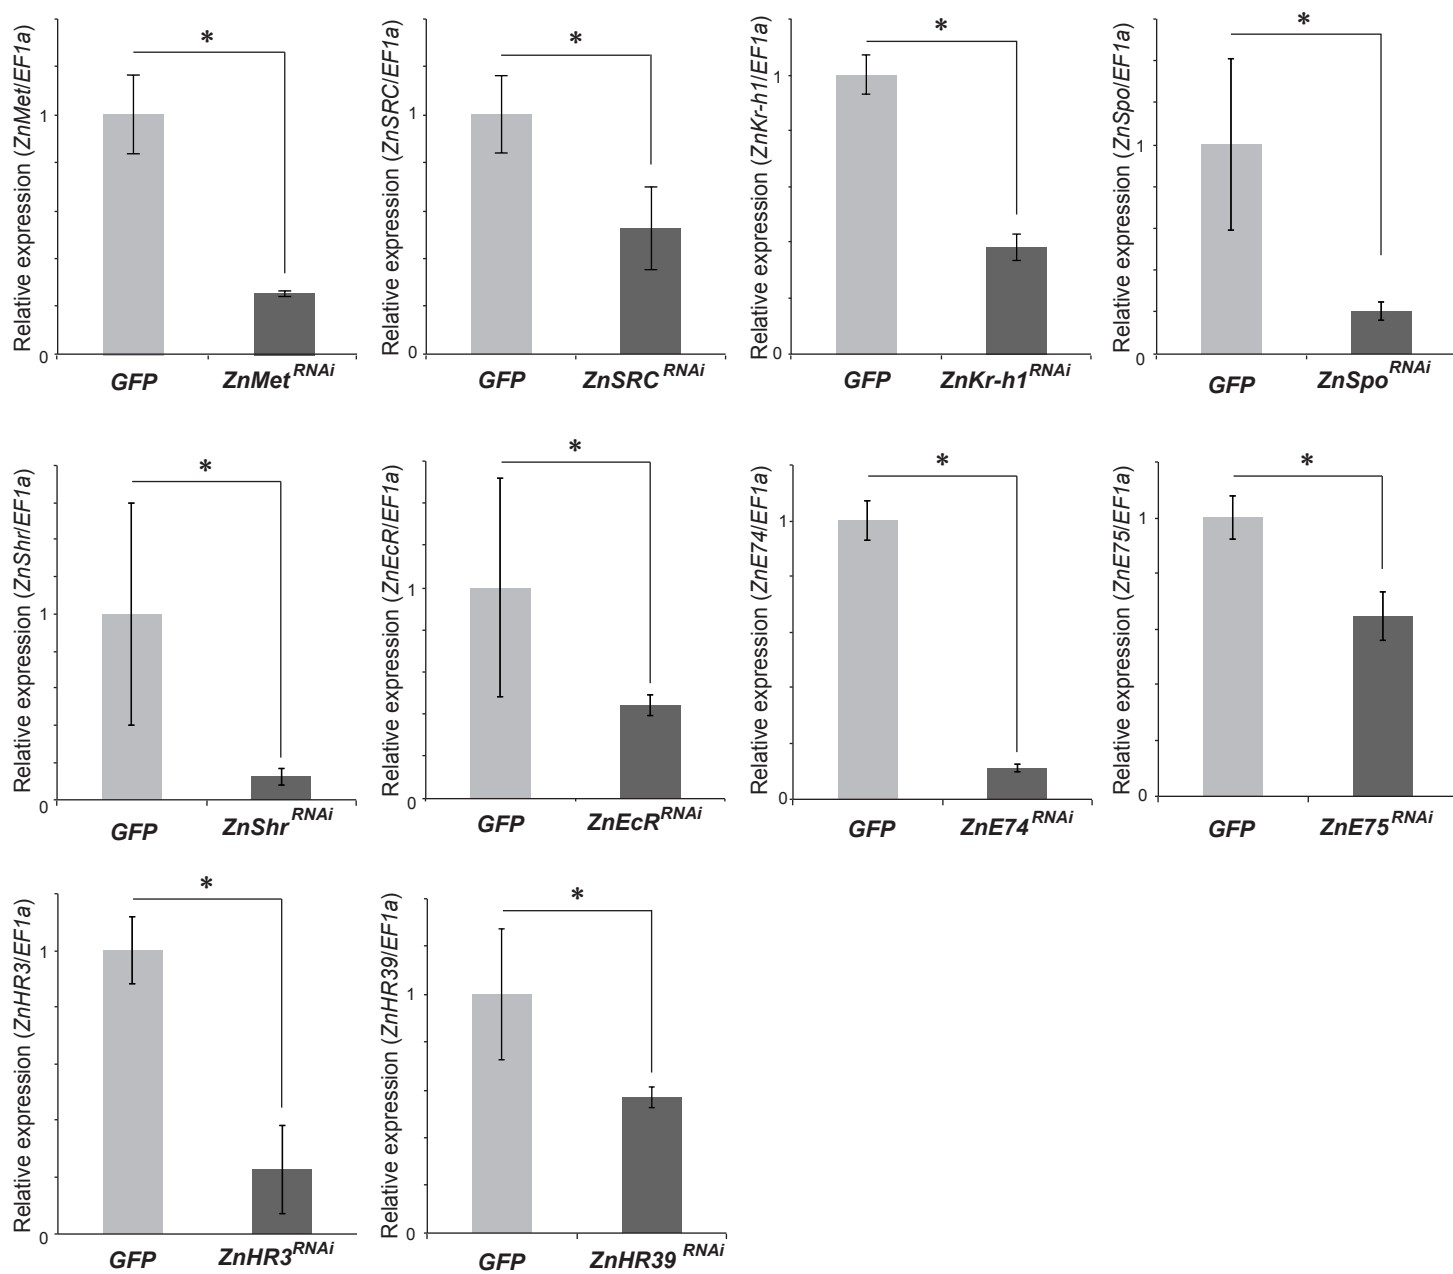

B

*C. punctulatus*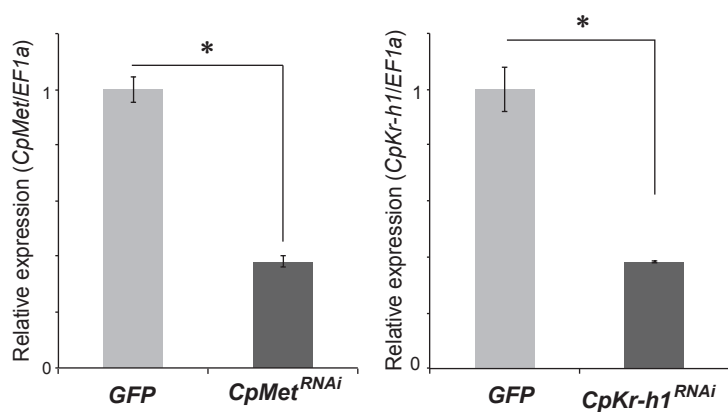

Fig. S1

Supplement: Supplementary file 2 [file 2]

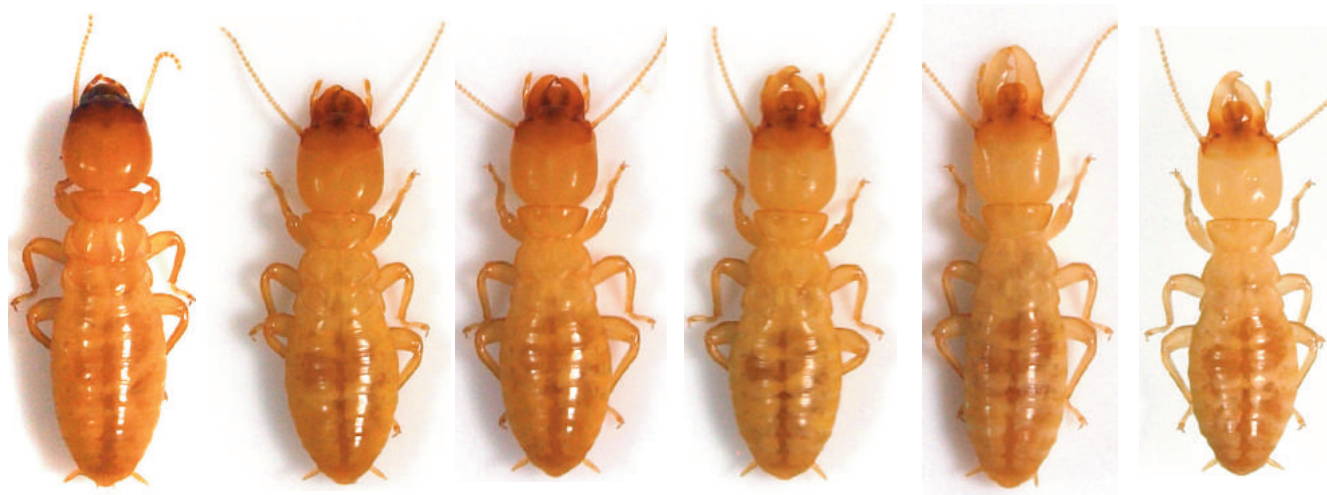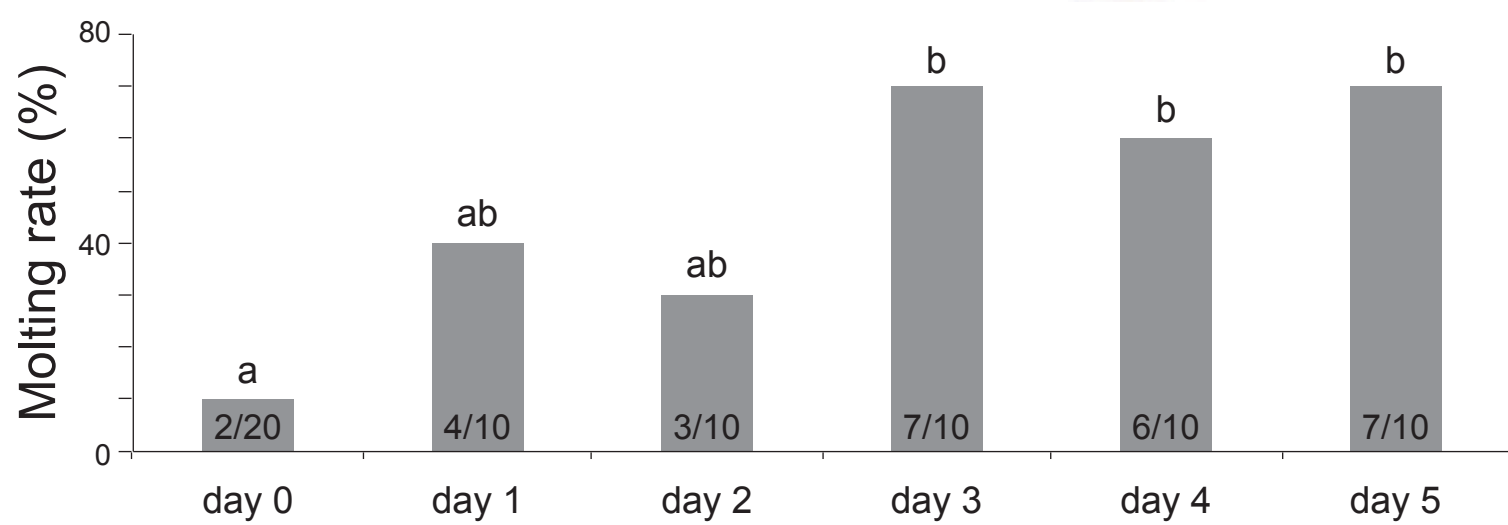

Fig.S2

Supplement: Supplementary file 3 [file 2]

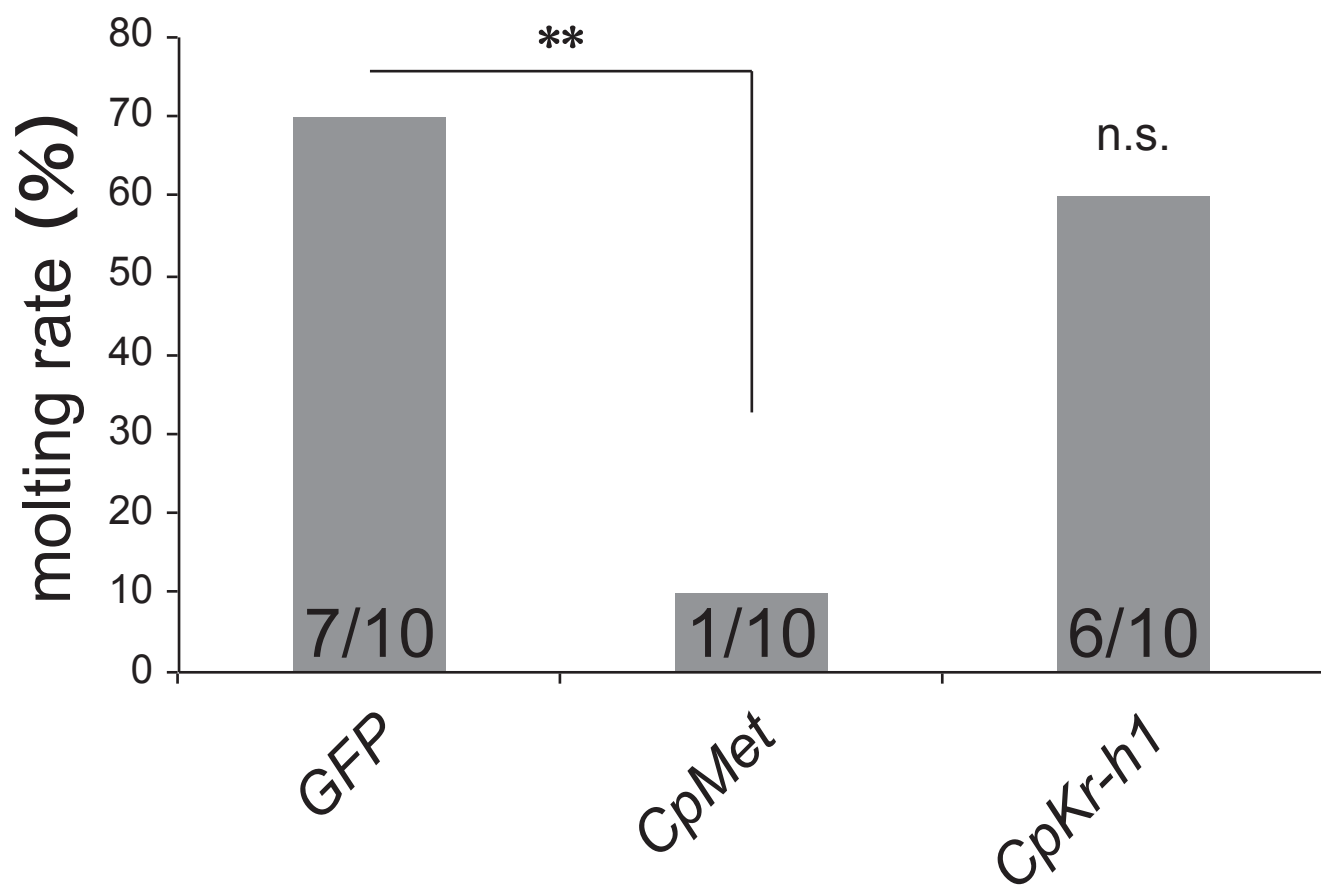

Fig.S3

Supplement: Supplementary file 4 [file 2]
